# Supplementary material for: Establishing the safety of waterbirth for mothers and babies: a cohort study with nested qualitative component: the protocol for the POOL study
Source: PubMed Central journal article supplement (PMC7798679; doi:10.1136/bmjopen-2020-040684), 2021-01-08
Supplement: bmjopen-2020-040684.draft_revisions.pdf [file bmjopen-2020-040684.draft_revisions.pdf]

# BMJ Open

BMJ Open is committed to open peer review. As part of this commitment we make the peer review history of every article we publish publicly available.

When an article is published we post the peer reviewers' comments and the authors' responses online. We also post the versions of the paper that were used during peer review. These are the versions that the peer review comments apply to.

The versions of the paper that follow are the versions that were submitted during the peer review process. They are not the versions of record or the final published versions. They should not be cited or distributed as the published version of this manuscript.

BMJ Open is an open access journal and the full, final, typeset and author-corrected version of record of the manuscript is available on our site with no access controls, subscription charges or pay-per-view fees (<http://bmjopen.bmj.com>).

If you have any questions on BMJ Open's open peer review process please email [info.bmjopen@bmj.com](mailto:info.bmjopen@bmj.com)

# BMJ Open

**Establishing the safety of waterbirth for mothers and babies: A cohort study with nested qualitative component: The protocol for the POOL study.**

|                               |                                                                                                                                                                                                                                                                                                                                                                                                                                                                                                                                                                                                                                                                                                                                                                                                                                                                                                                                                                                                                                                                                            |
|-------------------------------|--------------------------------------------------------------------------------------------------------------------------------------------------------------------------------------------------------------------------------------------------------------------------------------------------------------------------------------------------------------------------------------------------------------------------------------------------------------------------------------------------------------------------------------------------------------------------------------------------------------------------------------------------------------------------------------------------------------------------------------------------------------------------------------------------------------------------------------------------------------------------------------------------------------------------------------------------------------------------------------------------------------------------------------------------------------------------------------------|
| Journal:                      | <i>BMJ Open</i>                                                                                                                                                                                                                                                                                                                                                                                                                                                                                                                                                                                                                                                                                                                                                                                                                                                                                                                                                                                                                                                                            |
| Manuscript ID                 | bmjopen-2020-040684                                                                                                                                                                                                                                                                                                                                                                                                                                                                                                                                                                                                                                                                                                                                                                                                                                                                                                                                                                                                                                                                        |
| Article Type:                 | Protocol                                                                                                                                                                                                                                                                                                                                                                                                                                                                                                                                                                                                                                                                                                                                                                                                                                                                                                                                                                                                                                                                                   |
| Date Submitted by the Author: | 20-May-2020                                                                                                                                                                                                                                                                                                                                                                                                                                                                                                                                                                                                                                                                                                                                                                                                                                                                                                                                                                                                                                                                                |
| Complete List of Authors:     | Milton, Rebecca; Cardiff University College of Biomedical and Life Sciences, Centre for Trials Research<br>Sanders, Julia; Cardiff University, School of Healthcare Sciences<br>Barlow, Christian; Cardiff University, Centre for Trials Research<br>Brocklehurst, Peter; University of Birmingham<br>Cannings-John, Rebecca; Cardiff University Centre for Trials Research, Channon, Sue; Cardiff University, Centre for Trials Research<br>Gale, Chris; Imperial College London, Neonatal Medicine, School of Public Health ;<br>Holmes, Abigail ; Cardiff and Vale UHB<br>Hunter, Billie; Cardiff University, School of Healthcare Sciences<br>Paranjothy, Shantini; Cardiff University, School of Medicine<br>Lugg-Widger, Fiona; Cardiff University, Centre for Trials Research<br>Milosevic, Sarah; Cardiff University, Centre for Trials Research<br>Morantz, Leah; PPI Representative<br>Plachcinski, Rachel; National Childbirth Trust<br>Nolan, Mary; University of Worcester, Institute of Health & Society<br>Robling, Michael; Cardiff University, Centre for Trials Research |
| Keywords:                     | OBSTETRICS, NEONATOLOGY, PUBLIC HEALTH                                                                                                                                                                                                                                                                                                                                                                                                                                                                                                                                                                                                                                                                                                                                                                                                                                                                                                                                                                                                                                                     |
|                               |                                                                                                                                                                                                                                                                                                                                                                                                                                                                                                                                                                                                                                                                                                                                                                                                                                                                                                                                                                                                                                                                                            |

SCHOLARONE™  
Manuscripts

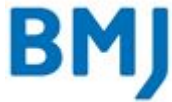

I, the Submitting Author has the right to grant and does grant on behalf of all authors of the Work (as defined in the below author licence), an exclusive licence and/or a non-exclusive licence for contributions from authors who are: i) UK Crown employees; ii) where BMJ has agreed a CC-BY licence shall apply, and/or iii) in accordance with the terms applicable for US Federal Government officers or employees acting as part of their official duties; on a worldwide, perpetual, irrevocable, royalty-free basis to BMJ Publishing Group Ltd ("BMJ") its licensees and where the relevant Journal is co-owned by BMJ to the co-owners of the Journal, to publish the Work in this journal and any other BMJ products and to exploit all rights, as set out in our [licence](#).

The Submitting Author accepts and understands that any supply made under these terms is made by BMJ to the Submitting Author unless you are acting as an employee on behalf of your employer or a postgraduate student of an affiliated institution which is paying any applicable article publishing charge ("APC") for Open Access articles. Where the Submitting Author wishes to make the Work available on an Open Access basis (and intends to pay the relevant APC), the terms of reuse of such Open Access shall be governed by a Creative Commons licence – details of these licences and which [Creative Commons](#) licence will apply to this Work are set out in our licence referred to above.

Other than as permitted in any relevant BMJ Author's Self Archiving Policies, I confirm this Work has not been accepted for publication elsewhere, is not being considered for publication elsewhere and does not duplicate material already published. I confirm all authors consent to publication of this Work and authorise the granting of this licence.

1  
2  
3 Establishing the safety of waterbirth for mothers and babies: A cohort study with nested qualitative component:  
4 The protocol for the POOL study.  
5  
6

### 7 **Corresponding Author**

8 Rebecca Milton<sup>1</sup> [MiltonRL1@cardiff.ac.uk](mailto:MiltonRL1@cardiff.ac.uk) Telephone: 02920687518  
9 Address: Room 702C, 7<sup>th</sup> Floor, Neuadd Meirionnydd, Heath Park, Cardiff, CF14 4YS  
10  
11  
12

13 Julia Sanders<sup>2</sup> [SandersJ3@cardiff.ac.uk](mailto:SandersJ3@cardiff.ac.uk)  
14 Christian Barlow<sup>1</sup> [BarlowC2@cardiff.ac.uk](mailto:BarlowC2@cardiff.ac.uk)  
15 Peter Brocklehurst<sup>3</sup> [p.brocklehurst@bham.ac.uk](mailto:p.brocklehurst@bham.ac.uk)  
16 Rebecca Cannings-John<sup>1</sup> [CanningsRL@cardiff.ac.uk](mailto:CanningsRL@cardiff.ac.uk)  
17 Sue Channon<sup>1</sup> [ChannonS2@cardiff.ac.uk](mailto:ChannonS2@cardiff.ac.uk)  
18 Christopher Gale<sup>4</sup> [Christopher.gale@imperial.ac.uk](mailto:Christopher.gale@imperial.ac.uk)  
19 Abigail Holmes<sup>5</sup> [Abigail.holmes@wales.nhs.uk](mailto:Abigail.holmes@wales.nhs.uk)  
20 Billie Hunter<sup>2</sup> [HunterB1@cardiff.ac.uk](mailto:HunterB1@cardiff.ac.uk)  
21 Shantini Paranjothy<sup>6</sup> [ParanjothyS@cardiff.ac.uk](mailto:ParanjothyS@cardiff.ac.uk)  
22 Fiona Lugg-Widger<sup>1</sup> [LuggFV@cardiff.ac.uk](mailto:LuggFV@cardiff.ac.uk)  
23 Sarah Milosevic<sup>1</sup> [MilosevicS@cardiff.ac.uk](mailto:MilosevicS@cardiff.ac.uk)  
24 Leah Morantz<sup>7</sup> [Leah.morantz@gmail.com](mailto:Leah.morantz@gmail.com)  
25 Rachel Plachcinski<sup>8</sup> [Rachel.plachcinski@gmail.com](mailto:Rachel.plachcinski@gmail.com)  
26 Mary Nolan<sup>9</sup> [M.Nolan@worc.ac.uk](mailto:M.Nolan@worc.ac.uk)  
27 Michael Robling<sup>1</sup> [RoblingMR@cardiff.ac.uk](mailto:RoblingMR@cardiff.ac.uk)  
28  
29  
30  
31  
32  
33  
34  
35

### 36 **Author Affiliations**

- 37 1. Centre for Trials Research, Cardiff University, Cardiff, UK
- 38 2. School of Healthcare Sciences, Cardiff University, Cardiff, UK
- 39 3. Birmingham Clinical Trials Unit, University of Birmingham, UK
- 40 4. Imperial College London, London, UK
- 41 5. Cardiff and Vale University Health Board, Cardiff, UK
- 42 6. Division of Population Health, School of Medicine, Cardiff University, Cardiff, UK
- 43 7. PPI Representative
- 44 8. National Childbirth Trust, UK
- 45 9. Institute of Health and Society, University of Worcester, Worcester, UK
- 46
- 47
- 48
- 49
- 50

51 Word Count: 4,055

52 Keywords: Waterbirth, pool, birth, water immersion analgesia, neonate, maternal, routine data.  
53  
54  
55  
56  
57  
58  
59  
60

## ABSTRACT

**Introduction:** Approximately 60,000 (9/100) infants are born into water annually in the UK and this is likely to increase. Case reports identified infants with water inhalation or sepsis following birth in water and there is a concern that women giving birth in water may sustain more complex perineal trauma. There have not been studies large enough to show whether waterbirth increases these poor outcomes. The POOL Study [ISRCTN 13315580] plans to answer the question about the safety of waterbirths among women who are classified appropriate for midwifery-led intrapartum care.

**Methods and Analysis:** A cohort study with a nested qualitative component. Objectives will be answered; using retrospective and prospective data captured in electronic NHS maternity and neonatal systems. The qualitative component aims to explore factors influencing pool-use and waterbirth; data will be gathered via discussion groups, interviews and case studies of maternity units.

**Ethics and Disseminations:** The protocol has been approved by NHS Wales Research Ethics Committee (18/WA/0291) the transfer of identifiable data has been approved by Health Research Authority Confidentiality Advisory Group (18CAG0153).

Study findings and innovative methodology will be disseminated through peer-reviewed journals, conferences and events. Results will be of interest to the general public, clinical and policy stakeholders in the UK and will be disseminated accordingly.

### Strengths and Limitations of the Study:

- Using large retrospective and prospective datasets concomitantly provides six years' data over a three-year study period.
- Ability to look at all neonatal outcomes and treatments across the wide geographical range and number of units.
- Using existing, routine data enhanced by prospective data to investigate the safety of waterbirth across a range of outcomes.
- Data collected will only represent users of Wellbeing-Software's EuroKing® maternity software system.
- Allocation is not random, so unmeasured confounding is possible.

## INTRODUCTION

In 1992 the House of Commons Health Committee recommended hospitals should provide women with the use of a birth pool for labour ‘*where this is practicable*’<sup>1</sup>. In the intervening years the popularity of the use of water immersion for labour and birth in the UK has increased and since 2007 The National Institute for Health and Care Excellence (NICE) guidance has recommended water immersion analgesia made available to all clinically appropriate women in labour<sup>2</sup>.

The Cochrane review of water immersion during labour provided evidence supportive of pool-use for labour analgesia but could not answer the question relating to the safety of waterbirth for mother or baby. The review included 12 trials (3,243 women), nine of which focused on the first stage of labour. Results from six studies looking at the first stage of labour found a significant reduction in the rate of regional analgesia/anaesthesia amongst women allocated to water immersion compared to no immersion (478/1,254 versus 529/1,245 respectively; risk ratio (RR) 0.90; 95% confidence interval (CI) 0.82 to 0.99)<sup>3</sup>.

Many professionals and parents have strong opinions on waterbirth. Some are great advocates, promoting benefits of waterbirth, whilst others remain concerned that women who give birth in water may be exposing themselves or their baby to additional unnecessary risks<sup>4,5,6</sup>.

This study is collecting data on births to all women in up to 29 UK maternity units from 2015 and is identifying the numbers, proportion and characteristics of women who use water immersion during labour or birth. The study will also establish whether waterbirth is as safe for mothers and their infants as using a pool during labour but getting out prior to birth. Data will be collected on 15,000 waterbirths and 15,000 land births among women with uncomplicated pregnancies from National Health Service (NHS) sites which use Wellbeing Software’s (WS) maternity software system EuroKing®. This study will use data recorded routinely as part of standard maternity care and stored on the respective NHS site’s server. For infants admitted to a neonatal unit (NNU), the study will also use data held by the National Neonatal Research Database (NNRD). Data needed to answer some study questions are already recorded, for example perineal trauma, therefore, data from births from 2015 onwards can be included. Existing, routinely collected data does not capture all information to answer the study questions, data items missing from existing routinely collected data include infants receiving antibiotics without admission to NNU and whether following waterbirth the placenta is delivered in or out of water. Cardiff University (CU) has worked with WS in order to develop study specific data fields which will enable these data to be captured in participating sites from 2019 onwards.

## METHODS AND ANALYSIS

### Primary research objective

To establish whether for low risk women who use a pool during labour, waterbirth, compared to leaving a pool prior to birth, is as safe for mothers and infants.

**Secondary objectives**

To establish:

1. Overall proportion and characteristics of women who use a pool for labour or birth, compared to those who do not use a pool.
2. Characteristics of, and outcomes for, women with risk factors, who use a pool during labour.
3. Characteristics of, and outcomes for, women who develop labour complications who use a pool during labour.
4. Factors associated with rates of pool-use in individual maternity units.

**Primary outcomes**

**Maternal primary outcome:** Obstetric Anal Sphincter Injury (OASIS)

**Infant primary outcome:** A composite of 'adverse infant outcomes or treatment' to include:

1. Any NNU admission requiring respiratory support
2. Antibiotic administration within 48 hours of birth (with/without culture proven infection)
3. Intrapartum stillbirth or all deaths prior to NNU/postnatal ward discharge

**Secondary outcomes**

**Maternal secondary outcomes:**

Maternal Intrapartum:

- Shoulder dystocia and required management
- Management of the third stage of labour (whether the placenta was intended to be, or delivered in or out of water)
- Obstetric involvement in care
- Incidence and management of perineal trauma
- Maternal position at birth

Maternal Postnatal:

- Duration of postnatal stay
- Breastfeeding
- Need for higher-level care
- Maternal readmission to hospital within seven days of birth.

**Infant secondary outcomes:**

- Timing of cord clamping
- Apgar scores (1, 5 and 10 minutes)
- Cause of intrapartum stillbirth or death prior to NNU/postnatal ward discharge

Incidence of:

- NNU admission requiring respiratory support
- Antibiotic administration within 48 hours of birth (with/without culture proven infection)

- Intrapartum stillbirth or neonatal death occurring within seven days of birth
- Neonatal resuscitation
- Snapped umbilical cord prior to clamping
- Skin to skin contact at birth
- First breastfeed within first hour
- Culture proven infection
- Brachial plexus injury
- Treatment for jaundice
- Readmission to hospital within seven days of birth
- Receipt of therapeutic hypothermia
- NNU admissions
- Respiratory support

A further set of secondary outcomes were piloted at one site including highest C-reactive protein results and successful/attempted lumbar puncture. Data collection was successful and included in the dataset for all sites.

### Study Design

A natural experiment using a cohort design with a nested qualitative component will answer study objectives using a combination of retrospective and prospective data in electronic NHS maternity and neonatal information systems. The qualitative component will explore factors influencing pool-use and waterbirth. CU has partnered with WS who supply EuroKing® maternity software system in the UK and the NNRD to link data on infants transferred to NNU.

To answer all objectives approximately 600,000 individual computerised maternity records held on secure NHS servers in up to 29 NHS sites from January 2015 will be accessed. To provide necessary denominator data and to be able to compare characteristics of pool/non-pool users, a dataset will be extracted relating to women who did not use a pool in labour, a more extensive dataset will be extracted for women who used a pool in labour. An important clinical question is whether there is a differential effect of waterbirth on severe perineal trauma amongst nulliparous and parous women. This subgroup analysis requires a large sample (30,000). Data relating to perineal trauma and waterbirth are already captured. To avoid prolongation of the study, this analysis will combine retrospective and prospective data.

The sample required for the infant primary outcome is smaller (16,200) and, as essential data are not collected routinely for one component of this composite outcome (antibiotic administration within 48 hours of birth on postnatal wards) additional data fields will be added to maternity systems at study sites. Prospective data will be collected from January 2019.

NNRD<sup>7,8</sup> holds individual patient-level data on all infants admitted for NHS neonatal care in England, Wales and Scotland. To obtain detailed treatment and outcome information on infants admitted to NNU, following their



1  
2  
3 mothers' pool-use in labour, the identifiers during the period of prospective data collection will be extracted and  
4 matched to any records held by the NNRD.  
5  
6

7 The primary study aim is to compare maternal and infant outcomes for low risk women who gave birth in water  
8 (Group 1) against low risk women who left the water prior to birth for reasons other than clinical need (Group 2)  
9 **Error! Reference source not found.** shows the study population groups.  
10  
11  
12

### 13 **Data Providers and Datasets**

14 To answer the research questions, two datasets will be used, data extracted from EuroKing® maternity software  
15 system and data held by the NNRD. EuroKing® forms a comprehensive clinical dataset and is currently used by  
16 29 of the maternity NHS Trusts and Health Boards in the UK. All 200 NNUs in England, Wales and Scotland  
17 form the United Kingdom Neonatal Collaborative (UKNC) and contribute electronic health record data to the  
18 NNRD. The NNRD is a national resource formed of the Neonatal Dataset (an NHS Information Standard),  
19 comprising of 450 clearly defined variables extracted at patient-level from the commercial Electronic Health  
20 Record used by all UK NNUs. For the purpose of the POOL Study NNRD data will only be used from England  
21 and Wales, as no units in Scotland are supported by WS.  
22  
23  
24  
25  
26

27 For the retrospective data collection, the data extract will be created by WS for the period January 2015 until  
28 prospective data collection commences (site opening). This extract will be created remotely via WS accessing  
29 the participating site's server. A unique study number will be generated prior to data leaving the study sites. WS  
30 will transfer a pseudonymised version of this extract to CU and a separate extract of data containing the unique  
31 study number, and identifiers to NNRD (pool-use) using a secure file transfer process. NNRD will proceed to  
32 match the data received from WS to ensure complete records are obtained for infants transferred to NNU and  
33 send the pseudonymised dataset to CU.  
34  
35  
36  
37  
38

39 For prospective data the same format will be followed as for the retrospective data; WS will extract data quarterly  
40 from EuroKing® to CU and NNRD. Prospective data extracts will include the new variables added to EuroKing®  
41 (overview of key data items in Table 1). A separate syntax will direct the NHS number, unique study number  
42 and other identifiers of infants born to all women who used a pool during labour, after site opening, to the NNRD  
43 on a quarterly basis.  
44  
45  
46  
47

48 NNRD will send three matched datasets to CU for analysis (pilot study, once all sites are opened and at the end  
49 of study). Any NNRD data describing infants matched to the study will have NHS numbers removed prior to  
50 data being transferred back to CU with the unique study number.  
51  
52

53 Use of this method of case labelling will enable CU only to hold pseudonymised data, whilst facilitating the  
54 identification of mother/infant dyads and enable the matching of the NNU admission record onto to the mother  
55 and infant record held in EuroKing®, Figure 2 shows Data Flow.  
56  
57  
58  
59  
60

Table 1: Data Sources

| Data Provider      | Data Source               | Data Collection Period | Key Data Items                                                                                                                                                                                                                                                                                                                                                                                                                                                                                                                             |
|--------------------|---------------------------|------------------------|--------------------------------------------------------------------------------------------------------------------------------------------------------------------------------------------------------------------------------------------------------------------------------------------------------------------------------------------------------------------------------------------------------------------------------------------------------------------------------------------------------------------------------------------|
| Wellbeing Software | NHS Site (Maternity Unit) | From January 2015      | Routinely collected data items: <ul style="list-style-type: none"> <li>• Demographics</li> <li>• Use of pool for labour analgesia/waterbirth</li> <li>• Maternal health</li> <li>• Labour</li> <li>• Birth</li> <li>• Pregnancy history</li> <li>• Maternal medical and obstetric history</li> <li>• Midwifery or obstetric led intrapartum care</li> <li>• Delayed cord clamping (&gt;60 seconds after birth)</li> <li>• Type of intended care throughout labour</li> <li>• Maternal health conditions</li> </ul>                         |
| Wellbeing Software | NHS Site (Maternity Unit) | From site opening      | <ul style="list-style-type: none"> <li>• Risk status at pool entry</li> <li>• Reasons for pool exit</li> <li>• Obstetric care or input prior to birth</li> <li>• Birthing complications</li> <li>• Cord snapping prior to clamping</li> <li>• Obstetric care in immediate postnatal period.</li> <li>• Syntocinon® administered in water for labour augmentation</li> <li>• Cardiotocography (CTG) used in water</li> <li>• Placenta delivery in or out of water (waterbirths only)</li> <li>• Infant antibiotic administration</li> </ul> |

1  
2  
3  
4  
5  
6  
7  
8  
9  
10  
11  
12  
13  
14  
15  
16  
17  
18  
19  
20  
21  
22  
23  
24  
25  
26  
27  
28  
29  
30  
31  
32  
33  
34  
35  
36  
37  
38  
39  
40  
41  
42  
43  
44  
45  
46

|                                                                                             |                          |                   |                                                                                                                                                                                                                                                                                                                  |
|---------------------------------------------------------------------------------------------|--------------------------|-------------------|------------------------------------------------------------------------------------------------------------------------------------------------------------------------------------------------------------------------------------------------------------------------------------------------------------------|
|                                                                                             |                          |                   | <ul style="list-style-type: none"> <li>• Infant lumbar puncture</li> <li>• Infant blood culture</li> <li>• Highest neonatal CRP result</li> <li>• Treatment for jaundice</li> </ul>                                                                                                                              |
| National Neonatal Research Database (Data relating to neonates admitted to a neonatal unit) | NHS Site (Neonatal Unit) | From January 2015 | <ul style="list-style-type: none"> <li>• Neonatal unit admission and transfer</li> <li>• Level of care and number of days received</li> <li>• Respiratory support</li> <li>• Intravenous antibiotic administration</li> <li>• Infant death</li> <li>• Timing of cord clamping</li> </ul>                         |
|                                                                                             |                          |                   | <ul style="list-style-type: none"> <li>• Apgar scores</li> <li>• Resuscitation at birth</li> <li>• Culture proven infection</li> <li>• Brachial plexus injury</li> <li>• Treatment for jaundice</li> <li>• Readmission to neonatal unit within seven days of birth</li> <li>• Therapeutic hypothermia</li> </ul> |

### **Opportunity to Opt-Out**

This study will use data collected in NHS electronic systems that will be pseudonymised prior to transfer to the CU study team (Table 1). Approval for the transfer of identifiable patient data from WS to NNRD in order to match the infants transferred to NNU has been obtained under Section 251 (s251) of the NHS Act 2006.

Participants will have the option to opt-out by informing the maternity unit that they do not wish to participate. Individual sites will be facilitated to ensure all women are provided with relevant information to ensure they are aware of the option to opt-out.

### **Qualitative Component**

The aim of the qualitative component of the study is to identify and explore factors which influence the use of birth pools and giving birth in water.

Phase 1:

Six closed online discussion groups hosted on the CU website and telephone interviews:

1. Women with recent experience of maternity services
2. Heads of Midwifery and Midwifery Managers
3. Consultant Midwives
4. Band 5/6 clinically focused Midwives
5. Obstetricians
6. Neonatologists and Paediatricians

Phase 2:

In-depth organisational case studies across three study sites, comprising midwifery-led and obstetric units with a range of waterbirth rates. Data points:

- Key documents, online information and existing data relating to pool-use and waterbirth
- Information relating to unit equipment and facilities
- Group or individual discussions with staff and lay representatives

### **Study Participants Inclusion and Exclusion Criteria**

Cohort study:

Main Analysis: All women at low risk of complications who use water immersion during labour.

Descriptive analysis: All women giving birth at a participating NHS site between 2015 and 2020.

Eligible sites: NHS maternity services using EuroKing® with waterbirth facilities.

Qualitative component Phase 1:

(Participants must be from the UK, either within or outside study sites)

Online discussion group participants:

- Pregnant women or who have given birth within the last 12 months.

- Midwives (all grades/positions)
- Neonatologists, Obstetricians and Paediatricians (including trainees)

Telephone interview participants:

- UK Neonatologists\*
  - Obstetricians\*
  - Paediatricians\*
- \*(including trainees)

Qualitative component Phase 2:

Purposively selected case study sites to include midwifery and obstetric units with a range of waterbirth rates (excluding units without a waterbirth facilities).

In each case study site, participants are purposively sampled for discussions, to include the following:

- Midwives representing a range of grades and positions
- Obstetricians, Neonatologists and Paediatricians (including trainees)
- Other unit staff as identified
- Women who have given birth in the unit recently
- Lay representatives who have experience of supporting local women who have given birth recently – e.g. doulas

### **Recruitment/Opt-out**

For the cohort study data will be collected on all women and babies born at participating sites from January 2015 until study end date unless they choose to opt-out of the study.

The online discussion groups will be advertised via social media, magazine articles, e-mail circulation and leaflets/flyers handed out at conferences. Adverts will provide a brief overview of the discussion groups and a website link which will contain study overview, a Participant Information Sheet (PIS) and discussion group ground rules. If keen to participate, individuals will submit their email address via the website, which will generate an automated email invitation with a link to the discussion group registration page. Participants will be asked to complete an online consent form, create an anonymous public forum name and password to log in to the discussion, and click to confirm that they agree to comply with the discussion group ground rules.

The telephone interviews will be advertised via professional and lay networks, including social media and email circulation. Adverts will provide a brief overview of the study and the purpose of the interviews, together with a contact email address for those interested in taking part. Potential participants will be emailed a copy of the PIS and given the opportunity to ask questions. Those who would like to take part will be asked via email to agree a date for the interview.

1  
2  
3 For Phase 2 of the qualitative work, data provided by sites will be used to identify midwifery-led and obstetric  
4 units, enabling the team to work with sites with both low and high waterbirth rates. Once potential sites are  
5 identified, the site PI will be contacted by a member of the study team, provided with information about the case  
6 studies and invited to take part. For the discussions within the case study sites, the study will be publicised at unit  
7 meetings and via local networks, and potential participants requested to contact the research team to receive  
8 information. Researchers will also approach staff members and lay representatives directly to encourage voluntary  
9 participation. A PIS and opportunity to ask questions will be provided. Those who would like to take part will be  
10 asked to contact the researchers to arrange to participate in a discussion.  
11  
12  
13  
14  
15

### 16 *Justification of approach*

17 The POOL Study will collect data on 600,000 mother/infant dyads with three years of these data having been  
18 collected in electronic systems prior to site opening. It is not practical to ask for consent from every woman and  
19 doing so would inevitably lead to an incomplete cohort and potentially a biased sample. The study will involve  
20 the transfer of personal data to NNRD and for this we are using an opt-out model under s251, as approved by the  
21 Confidentiality Advisory Group (CAG).  
22  
23  
24  
25

### 26 *Development of the opt-out leaflet/cards*

27 We worked closely with the study PPI representatives on the wording of these documents. A key consideration  
28 was to ensure that there were multiple timepoints for the mother to opt-out of the study throughout her episode  
29 of maternity care, by informing a midwife or making contact with the maternity unit. In addition to informing  
30 all women during pregnancy that the study is running in their maternity unit, any woman who uses a pool during  
31 labour or birth will be provided with a study card. This will reinforce the option to opt-out of the study with  
32 relevant contact details. The final text was approved by both an NHS Research Ethics Committee (REC) and  
33 CAG committee as part of the overall governance approval for the study.  
34  
35  
36  
37  
38

### 39 *Process to manage opt-out*

40 If opt-out is selected, a healthcare worker will select the opt-out option on EuroKing®, automatically generating  
41 a filter so that WS will not extract the mother's/infant's data, nor will data be sent to the NNRD. It was not  
42 practical to offer the chance to opt-out to women who gave birth at participating units in the period between  
43 January 2015 to date of site opening.  
44  
45  
46  
47

48 For the online discussion groups, participants may contribute as much or as little as they wish. For face-to-face  
49 and telephone discussions, participants have the right to decline or withdraw consent at any time, without any  
50 effect on their care or employment.  
51  
52

### 53 **Patient and Public Involvement (PPI)**

54 Lay persons were involved in the original grant proposal, development of research questions, study design and  
55 outcomes. The study management group and the study steering committee have PPI representatives who were  
56 actively engaged in study design and study conduct.  
57  
58  
59  
60

## Governance and Compliance

Following REC approval (18/WA/0291) and s251 support (18CAG0153) retrospective data extracts were made from the pilot site. New variables were added to EuroKing® for the commencement of prospective data collection.

In order to satisfy the requirements of the s251 support the Data Security and Protection Toolkit (DSPT)<sup>9</sup> commissioned by the Department of Health for NHS Digital to develop and maintain) was required for both WS (registered as Healthcare Software Solutions) and NNRD (registered as Chelsea and Westminster Hospital NHS Foundation Trust). This organisation-level assessment provides reassurance of satisfactory information governance within the two organisations. Both the s251 support and DSPT are assessed and renewed on an annual basis.

## Analysis

### *Sample size*

The non-inferiority of birth in water compared to birth on land on rates of OASIS will be examined by parity. The Birthplace in England study found that overall 4.6% and 1.6% of nulliparous and parous women respectively, sustained OASIS<sup>10</sup>. A sample size of 15,000 nulliparous and 15,000 parous low risk women (7,500 each water and land) is required to obtain 90% power, and a 95% one-sided confidence interval around a treatment difference of zero. A non-inferiority margin of 1% or less, and 0.6% or less will be taken as clinically non-significant amongst nulliparous and parous low risk women respectively. Since nulliparous women birthing in water are regarded as the least prevalent of the four groups, the data collected would provide data on 7,500 would ensure adequate numbers in the other three, more prevalent groups. These data will be combined to assess the effects averaged across both strata at an increased power, with a sample size of 30,000 low risk women. We have assumed that 25% of the 6,600 waterbirths recorded in EuroKing® in 2015 were nulliparous women (1650/annum). For the infant primary outcome, an estimate of 5% is used for the proportion of infants born to low risk mothers experiencing ‘adverse infant outcome or treatment’<sup>11</sup>. A non-inferiority margin of 1.0% or less will be taken as clinically non-significant. A sample size of 16,200 infants (8,100 per group water/land) are required to have 90% power, and a 95% one sided confidence interval around a treatment difference of zero.

### **Main analysis**

The primary analyses are based on a non-inferiority test of birth in water versus on land, comparing 1) the proportion of mothers that have OASIS (based on retrospective and prospective EuroKing® data), and 2) the proportion of infants with a composite outcome of ‘adverse infant outcome or treatment’ (based on prospective EuroKing® and NNRD data).

To test the primary hypothesis of non-inferiority between birth in water and on land, the maternal and infant primary outcomes will be evaluated for non-inferiority using logistic regression models, in the first instance with no adjustment for covariates. Adjusting for potential confounders may result in a more precise treatment effect estimate. The potential confounders of both primary outcomes (listed in Table 2) will be considered. Directed acyclic graphs; visual representations of causal assumptions will be used to identify the presence of confounders.

The main logistic model will incorporate these selected covariates through regression adjustment. Results will be reported as an unadjusted and adjusted odds ratio (OR) (comparing birth in water to on land), and a two-sided 90% confidence interval (CI) for the unadjusted and adjusted OR will be calculated. Non-inferiority will be concluded if the upper limit of the 90% CI for the difference in infant outcome between the groups is less than 1.0% (OR<1.21). Similarly, for the mother's outcome, non-inferiority will be concluded if the upper limit of the 90% CI for the difference in the proportion of OASIS between the groups is less than 1.0% (OR<1.23) in nulliparous low risk women and less than 0.6% (OR<1.38) in parous low risk women. The data will then be combined to assess the effects averaged across both strata.

Table 2: Potential confounders for both maternal and infant primary outcomes

|                                                                                  | <b>Maternal outcome: OASIS</b> | <b>Adverse infant composite outcome</b> |
|----------------------------------------------------------------------------------|--------------------------------|-----------------------------------------|
| Maternal age (years)                                                             | X                              | X                                       |
| Maternal BMI                                                                     | X                              | X                                       |
| Parity                                                                           | X                              |                                         |
| Duration of labour                                                               | X                              | X                                       |
| Gestational age at delivery (weeks)                                              | X                              | X                                       |
| Birth weight (g)                                                                 | X                              | X                                       |
| Infant head circumference (cms)                                                  | X                              |                                         |
| Maternal thyroid disease (including hypothyroidism)                              |                                | X                                       |
| Pre-labour ruptured membranes                                                    |                                | X                                       |
| Intrapartum fever                                                                |                                | X                                       |
| Small for gestational age (weight <10 <sup>th</sup> centile for gestational age) |                                | X                                       |
| Infant gender                                                                    |                                | X                                       |
| Meconium stained liquor                                                          |                                | X                                       |

If non-inferiority is shown, then superiority analysis will be conducted as secondary analysis of the primary outcomes using logistic regression and will be presented as (unadjusted and adjusted) OR of outcomes in the waterbirth group compared with the birth on land group. Parameter estimates will be provided alongside 95% CI and p-value. Secondary outcomes will have non-inferiority testing as detailed above.

All telephone and face-to-face discussions in Phase 1 and Phase 2 will be audio-recorded and transcribed verbatim. For Phase 1 of the qualitative component, framework analysis will be undertaken to generate key hypotheses for further exploration in Phase 2. In Phase 2, data will be thematically analysed initially, supported by NVivo, in order to develop an analytic framework, which will then be used to code all data.

## **ETHICS AND DISSEMINATION**

### **Legal and Ethical Considerations**

The cohort component uses routinely collected data without obtaining informed consent from participants; this required additional approval, s251, from a CAG. The level of national and international recognition of the



1  
2  
3 importance of the smarter use of routine data, and its value to research, has never been greater. There are,  
4 however, challenges associated with using routinely collected data.<sup>12</sup>  
5  
6

7 One primary consideration is of unintentional identification of individuals. This risk is managed through  
8 pseudonymising identifiable data prior to matching and before being transferred to CU for analysis and data  
9 scrutiny and cleaning on arrival.  
10  
11

12  
13 Participation in the online discussion groups and face-to-face or telephone discussions may bring back memories  
14 of difficult or distressing experiences. It is made clear in the PIS that participants can opt-out of discussions at  
15 any time, without giving a reason, and do not have to answer any questions they do not want to. There is a risk  
16 that online discussion group participants may encounter communication from other group members which causes  
17 distress. To mitigate this, participants will be asked to agree to a set of ground rules, including a section  
18 requesting they act in a respectful way to members. The discussion will be moderated by researchers during  
19 office hours (Monday to Friday, 9am to 5pm) and any unsuitable content will be removed. Repeated posting of  
20 unsuitable content by a group member will result in their being blocked. At any time, any participant who regards  
21 posted material as offensive will have the option of having the post removed from view.  
22  
23  
24  
25  
26

27 There is a risk of loss of privacy for participants in the qualitative study if data which identifies them is disclosed  
28 outside the study. Any information which could identify individuals or individual workplaces will be removed  
29 following data collection and will not be used in the reporting of findings. Quotes from discussion groups or  
30 interviews may be used in reports of the research, but no individuals or individual workplaces will be identified.  
31  
32  
33

### 34 **Data Processors and Data Controllers**

#### 35 *Relationship between CU and NHS Sites*

36 For the purposes of the research activities involved in POOL, CU is the Data Controller and the NHS Site is the  
37 Data Processor. For the avoidance of doubt, this is not in relation to the activities carried out as part of usual  
38 clinical practice but relates to the specific use of the data made for the research and also includes the new variables  
39 added to the EuroKing® system.  
40  
41  
42  
43  
44

#### 45 *Relationship between Wellbeing Software, NNRD and NHS Sites*

46 WS and NNRD are Data Processors in respect of all NHS Data collected by them from NHS sites in the course  
47 of their normal activities and in that they are processing NHS Data on behalf of NHS Sites who are Data  
48 Controllers.  
49  
50

#### 51 *Dissemination of findings*

52 Dissemination of the study results will include publication in high calibre journals through an open access  
53 agreement, a full report, a lay infographic summary aimed at pregnant women and available for use by NHS  
54 providers, and distribution through social media including podcasts or similar.  
55  
56  
57  
58  
59  
60

In addition to dissemination of results through publication, the results will be reported to the funder, WS, NNRD and all participating sites as well as all stakeholder groups associated with the POOL Study. On completion there will be a stakeholder event for results dissemination.

Table 3 provides a list of abbreviations used throughout the paper.

Table 3: List of abbreviations

| Abbreviation | Full details                                      |
|--------------|---------------------------------------------------|
| CAG          | Confidentiality Advisory Group                    |
| CRP          | C-reactive protein                                |
| CU           | Cardiff University                                |
| HTA          | Health Technology Assessment                      |
| IG           | Information Governance                            |
| NHS          | National Health Service                           |
| NICE         | National Institute for Health and Care Excellence |
| NIHR         | National Institute for Health Research            |
| NNRD         | National Neonatal Research Database               |
| OASIS        | Obstetrical Anal Sphincter Injuries               |
| REC          | Research Ethics Committee                         |
| s251         | Section 251 NHS Act 2006                          |
| WS           | Wellbeing Software                                |

#### AUTHORS CONTRIBUTIONS

RM has written the majority of the manuscript.

SM has provided content for the qualitative aspect of the manuscript.

RCJ has provided content for the statistical aspect of the manuscript.

JS, RC-J and FLW co-wrote the protocol.

All other authors have read and approved the final manuscript.

#### FUNDING STATEMENT

This work was supported by the National Institute for Health Research Health Technology Assessment (project number 16/149/01). The views and opinions expressed therein are those of the authors and do not necessarily reflect those of the NIHR HTA.

#### COMPETING INTERESTS STATEMENT

None to declare.

#### ACKNOWLEDGEMENTS

The Centre for Trials Research is funded by Health and Care Research Wales and Cancer Research UK.

**REFERENCES**

1. House of Commons. *House of Commons Health Select Committee. Maternity Services. Second Report.*; 1992
2. NICE. Intrapartum care for healthy women and babies. December 2014.
3. Er C, Burns E, Cuthbert A. Immersion in water during labour and birth (Review). 2018. doi:10.1002/14651858.CD000111.pub4.www.cochranelibrary.com
4. Franzin L, Cabodi D, Scolfaro C, Gioannini P. Microbiological investigation of a nosocomial case of *Legionella pneumophila* in acqua e revisione dei casi neonatali. 2004;69-75.
5. *Pseudomonas* Otitis Media and Bacteremia Following a Water Birth \_ American Academy of Pediatrics.
6. Mammas IN, Thiagarajan P. Water aspiration syndrome at birth – report of two cases. 2009;7058. doi:10.1080/14767050802556067
7. Gale C, Santhakumaran S, Nagarajan S, Statnikov Y, Modi N. Impact of managed clinical networks on NHS specialist neonatal services in England: Population based study. *BMJ*. 2012;344(7853):1-15. doi:10.1136/bmj.e2105
8. Battersby C, Statnikov Y, Santhakumaran S, Gray D, Modi N, Costeloe K. The United Kingdom national neonatal research database: A validation study. *PLoS One*. 2018;13(8):1-19. doi:10.1371/journal.pone.0201815
9. Data Security and Protection Toolkit. <https://www.dsptoolkit.nhs.uk> Accessed 18th May 2020.
10. Birthplace in England Collaborative G, Brocklehurst P, Hardy P, et al. Perinatal and maternal outcomes by planned place of birth for healthy women with low risk pregnancies: The Birthplace in England national prospective cohort study. *BMJ* 2011;343:d7400.
11. Hollowell J PD, Rowe R, Linsell L, Hardy P, Stewart, M, et al. The Birthplace national prospective cohort study: perinatal and maternal outcomes by planned place of birth. Birthplace in England research programme. Final report part 4. NIHR Service Delivery and Organisation programme. 2011.
12. *Maximising the Use of Routine Data for Research in Wales.*; 2013. [https://www.healthandcareresearch.gov.wales/uploads/Policy %26 Strategy/Use of routine data/Maximising the Use of Routine Data for Research in Wales.pdf](https://www.healthandcareresearch.gov.wales/uploads/Policy%26Strategy/Use%20of%20routine%20data/Maximising%20the%20Use%20of%20Routine%20Data%20for%20Research%20in%20Wales.pdf). Accessed November 13, 2018.

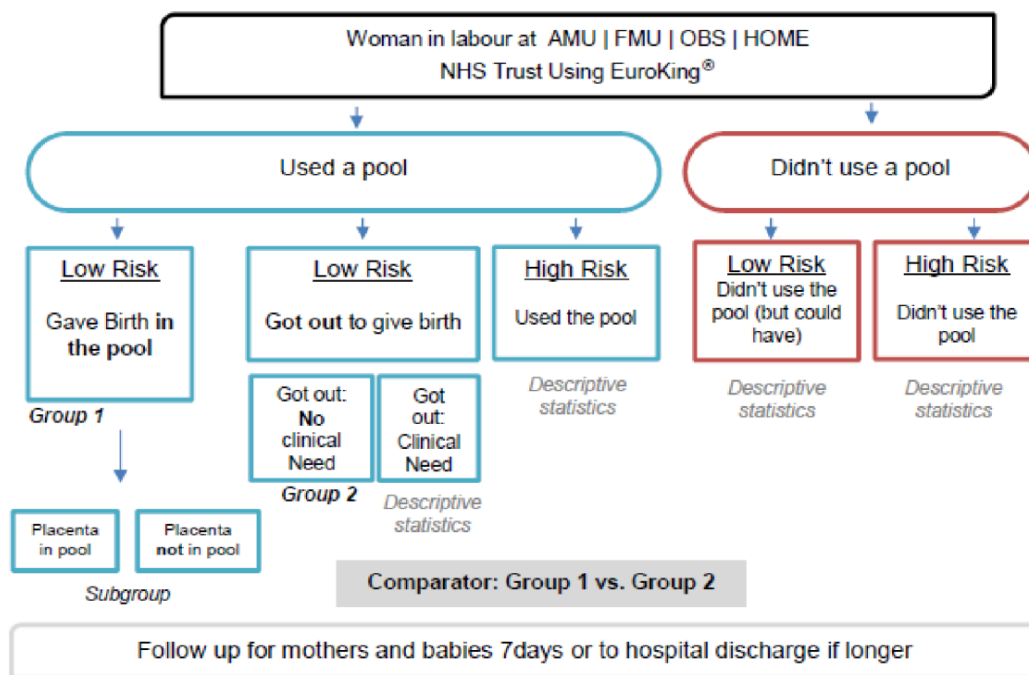

Figure 1 Study population groups

er review only

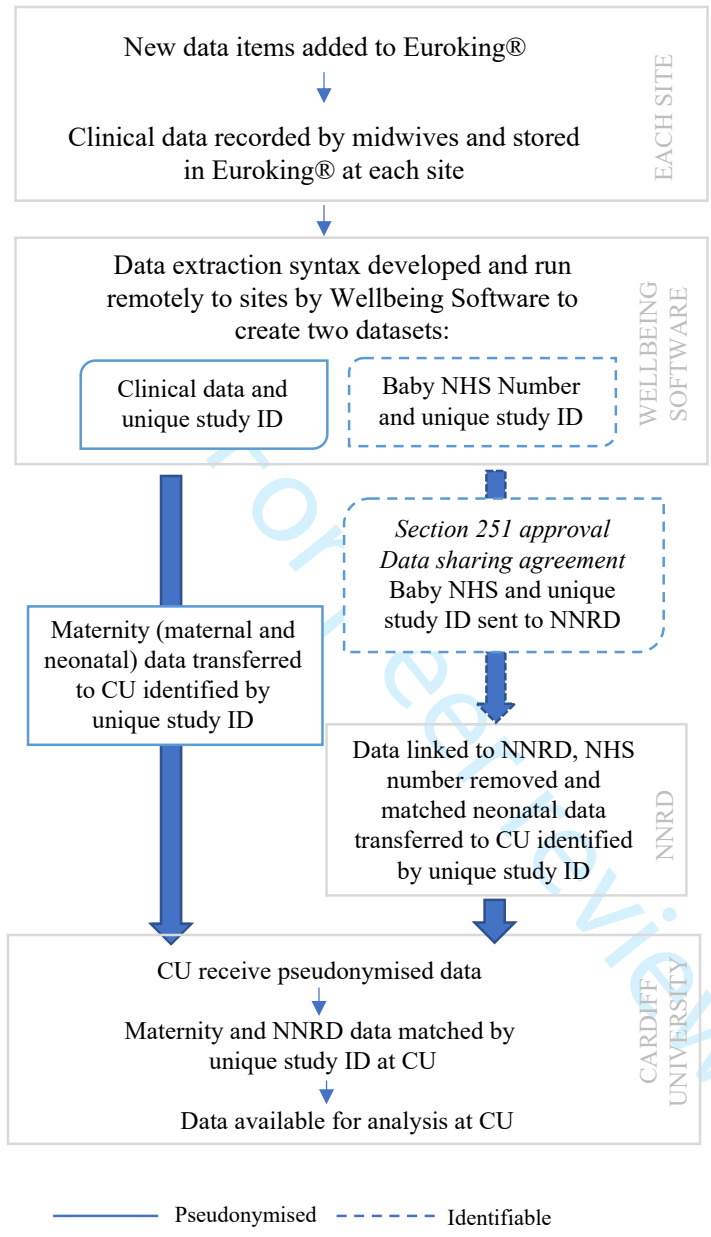

Figure 2 Data flow

# BMJ Open

## Establishing the safety of waterbirth for mothers and babies: A cohort study with nested qualitative component: The protocol for the POOL study.

|                                 |                                                                                                                                                                                                                                                                                                                                                                                                                                                                                                                                                                                                                                                                                                                                                                                                                                                                                                                                                                                                                                                                                                                 |
|---------------------------------|-----------------------------------------------------------------------------------------------------------------------------------------------------------------------------------------------------------------------------------------------------------------------------------------------------------------------------------------------------------------------------------------------------------------------------------------------------------------------------------------------------------------------------------------------------------------------------------------------------------------------------------------------------------------------------------------------------------------------------------------------------------------------------------------------------------------------------------------------------------------------------------------------------------------------------------------------------------------------------------------------------------------------------------------------------------------------------------------------------------------|
| Journal:                        | <i>BMJ Open</i>                                                                                                                                                                                                                                                                                                                                                                                                                                                                                                                                                                                                                                                                                                                                                                                                                                                                                                                                                                                                                                                                                                 |
| Manuscript ID                   | bmjopen-2020-040684.R1                                                                                                                                                                                                                                                                                                                                                                                                                                                                                                                                                                                                                                                                                                                                                                                                                                                                                                                                                                                                                                                                                          |
| Article Type:                   | Protocol                                                                                                                                                                                                                                                                                                                                                                                                                                                                                                                                                                                                                                                                                                                                                                                                                                                                                                                                                                                                                                                                                                        |
| Date Submitted by the Author:   | 26-Nov-2020                                                                                                                                                                                                                                                                                                                                                                                                                                                                                                                                                                                                                                                                                                                                                                                                                                                                                                                                                                                                                                                                                                     |
| Complete List of Authors:       | Milton, Rebecca; Cardiff University College of Biomedical and Life Sciences, Centre for Trials Research<br>Sanders, Julia; Cardiff University, School of Healthcare Sciences<br>Barlow, Christian; Cardiff University, Centre for Trials Research<br>Brocklehurst, Peter; University of Birmingham<br>Cannings-John, Rebecca; Cardiff University Centre for Trials Research, Channon, Sue; Cardiff University, Centre for Trials Research<br>Gale, Chris; Imperial College London, Neonatal Medicine, School of Public Health ;<br>Holmes, Abigail ; Cardiff and Vale UHB<br>Hunter, Billie; Cardiff University, School of Healthcare Sciences<br>Paranjothy, Shantini; University of Aberdeen, Health Data Science Research Centre<br>Lugg-Widger, Fiona; Cardiff University, Centre for Trials Research<br>Milosevic, Sarah; Cardiff University, Centre for Trials Research<br>Morantz, Leah; PPI Representative<br>Plachcinski, Rachel; National Childbirth Trust<br>Nolan, Mary; University of Worcester, Institute of Health & Society<br>Robling, Michael; Cardiff University, Centre for Trials Research |
| <b>Primary Subject Heading</b>: | Obstetrics and gynaecology                                                                                                                                                                                                                                                                                                                                                                                                                                                                                                                                                                                                                                                                                                                                                                                                                                                                                                                                                                                                                                                                                      |
| Secondary Subject Heading:      | Nursing, Qualitative research, Public health                                                                                                                                                                                                                                                                                                                                                                                                                                                                                                                                                                                                                                                                                                                                                                                                                                                                                                                                                                                                                                                                    |
| Keywords:                       | OBSTETRICS, NEONATOLOGY, PUBLIC HEALTH                                                                                                                                                                                                                                                                                                                                                                                                                                                                                                                                                                                                                                                                                                                                                                                                                                                                                                                                                                                                                                                                          |
|                                 |                                                                                                                                                                                                                                                                                                                                                                                                                                                                                                                                                                                                                                                                                                                                                                                                                                                                                                                                                                                                                                                                                                                 |

SCHOLARONE™  
Manuscripts



I, the Submitting Author has the right to grant and does grant on behalf of all authors of the Work (as defined in the below author licence), an exclusive licence and/or a non-exclusive licence for contributions from authors who are: i) UK Crown employees; ii) where BMJ has agreed a CC-BY licence shall apply, and/or iii) in accordance with the terms applicable for US Federal Government officers or employees acting as part of their official duties; on a worldwide, perpetual, irrevocable, royalty-free basis to BMJ Publishing Group Ltd ("BMJ") its licensees and where the relevant Journal is co-owned by BMJ to the co-owners of the Journal, to publish the Work in this journal and any other BMJ products and to exploit all rights, as set out in our [licence](#).

The Submitting Author accepts and understands that any supply made under these terms is made by BMJ to the Submitting Author unless you are acting as an employee on behalf of your employer or a postgraduate student of an affiliated institution which is paying any applicable article publishing charge ("APC") for Open Access articles. Where the Submitting Author wishes to make the Work available on an Open Access basis (and intends to pay the relevant APC), the terms of reuse of such Open Access shall be governed by a Creative Commons licence – details of these licences and which [Creative Commons](#) licence will apply to this Work are set out in our licence referred to above.

Other than as permitted in any relevant BMJ Author's Self Archiving Policies, I confirm this Work has not been accepted for publication elsewhere, is not being considered for publication elsewhere and does not duplicate material already published. I confirm all authors consent to publication of this Work and authorise the granting of this licence.

1  
2  
3 Establishing the safety of waterbirth for mothers and babies: A cohort study with nested qualitative component:  
4 The protocol for the POOL study.  
5  
6

### 7 **Corresponding Author**

8 Rebecca Milton<sup>1</sup> [MiltonRL1@cardiff.ac.uk](mailto:MiltonRL1@cardiff.ac.uk) Telephone: 02920687518  
9 Address: Room 702C, 7<sup>th</sup> Floor, Neuadd Meirionnydd, Heath Park, Cardiff, CF14 4YS  
10  
11  
12

13 Julia Sanders<sup>2</sup> [SandersJ3@cardiff.ac.uk](mailto:SandersJ3@cardiff.ac.uk)  
14 Christian Barlow<sup>1</sup> [BarlowC2@cardiff.ac.uk](mailto:BarlowC2@cardiff.ac.uk)  
15 Peter Brocklehurst<sup>3</sup> [p.brocklehurst@bham.ac.uk](mailto:p.brocklehurst@bham.ac.uk)  
16 Rebecca Cannings-John<sup>1</sup> [CanningsRL@cardiff.ac.uk](mailto:CanningsRL@cardiff.ac.uk)  
17 Sue Channon<sup>1</sup> [ChannonS2@cardiff.ac.uk](mailto:ChannonS2@cardiff.ac.uk)  
18 Christopher Gale<sup>4</sup> [Christopher.gale@imperial.ac.uk](mailto:Christopher.gale@imperial.ac.uk)  
19 Abigail Holmes<sup>5</sup> [Abigail.holmes@wales.nhs.uk](mailto:Abigail.holmes@wales.nhs.uk)  
20 Billie Hunter<sup>2</sup> [HunterB1@cardiff.ac.uk](mailto:HunterB1@cardiff.ac.uk)  
21 Shantini Paranjothy<sup>6</sup> [shantini.paranjothy@abdn.ac.uk](mailto:shantini.paranjothy@abdn.ac.uk)  
22 Fiona Lugg-Widger<sup>1</sup> [LuggFV@cardiff.ac.uk](mailto:LuggFV@cardiff.ac.uk)  
23 Sarah Milosevic<sup>1</sup> [MilosevicS@cardiff.ac.uk](mailto:MilosevicS@cardiff.ac.uk)  
24 Leah Morantz<sup>7</sup> [Leah.morantz@gmail.com](mailto:Leah.morantz@gmail.com)  
25 Rachel Plachcinski<sup>8</sup> [Rachel.plachcinski@gmail.com](mailto:Rachel.plachcinski@gmail.com)  
26 Mary Nolan<sup>9</sup> [M.Nolan@worc.ac.uk](mailto:M.Nolan@worc.ac.uk)  
27 Michael Robling<sup>1</sup> [RoblingMR@cardiff.ac.uk](mailto:RoblingMR@cardiff.ac.uk)  
28  
29  
30  
31  
32  
33  
34  
35

### 36 **Author Affiliations**

- 37 1. Centre for Trials Research, Cardiff University, Cardiff, UK
- 38 2. School of Healthcare Sciences, Cardiff University, Cardiff, UK
- 39 3. Birmingham Clinical Trials Unit, University of Birmingham, UK
- 40 4. Imperial College London, London, UK
- 41 5. Cardiff and Vale University Health Board, Cardiff, UK
- 42 6. Public Health, University of Aberdeen, UK
- 43 7. PPI Representative
- 44 8. National Childbirth Trust, UK
- 45 9. Institute of Health and Society, University of Worcester, Worcester, UK
- 46
- 47
- 48
- 49
- 50

51 Word Count: 4,316

52 Keywords: Waterbirth, pool, birth, water immersion analgesia, neonate, maternal, routine data.  
53  
54  
55  
56  
57  
58  
59  
60



## ABSTRACT

**Introduction:** Approximately 60,000 (9/100) infants are born into water annually in the UK and this is likely to increase. Case reports identified infants with water inhalation or sepsis following birth in water and there is a concern that women giving birth in water may sustain more complex perineal trauma. There have not been studies large enough to show whether waterbirth increases these poor outcomes. The POOL Study [ISRCTN 13315580] plans to answer the question about the safety of waterbirths among women who are classified appropriate for midwifery-led intrapartum care.

**Methods and Analysis:** A cohort study with a nested qualitative component. Objectives will be answered; using retrospective and prospective data captured in electronic NHS maternity and neonatal systems. The qualitative component aims to explore factors influencing pool-use and waterbirth; data will be gathered via discussion groups, interviews and case studies of maternity units.

**Ethics and Disseminations:** The protocol has been approved by NHS Wales Research Ethics Committee (18/WA/0291) the transfer of identifiable data has been approved by Health Research Authority Confidentiality Advisory Group (18CAG0153).

Study findings and innovative methodology will be disseminated through peer-reviewed journals, conferences and events. Results will be of interest to the general public, clinical and policy stakeholders in the UK and will be disseminated accordingly.

### Strengths and Limitations of the Study:

- Using large retrospective and prospective datasets concomitantly provides six years' data over a three-year study period.
- Ability to look at all neonatal outcomes and treatments across the wide geographical range and number of units.
- Using existing, routine data enhanced by prospective data to investigate the safety of waterbirth across a range of outcomes.
- Data collected will only represent users of Wellbeing-Software's EuroKing® maternity software system.
- Allocation is not random, so unmeasured confounding is possible.

## INTRODUCTION

In 1992 the House of Commons Health Committee recommended hospitals should provide women with the use of a birth pool for labour ‘*where this is practicable*’<sup>1</sup>. In the intervening years the popularity of the use of water immersion for labour and birth in the UK has increased and since 2007 The National Institute for Health and Care Excellence (NICE) recommends water immersion analgesia be made available to all clinically appropriate, low-risk, women in labour.<sup>2</sup>

The Cochrane review of water immersion during labour provided evidence supportive of pool-use for labour analgesia but could not answer the question relating to the safety of waterbirth for mother or baby. The review included 12 trials (3,243 women), nine of which focused on the first stage of labour. Results from six studies looking at the first stage of labour found a significant reduction in the rate of regional analgesia/anaesthesia amongst women allocated to water immersion compared to no immersion (478/1,254 versus 529/1,245 respectively; risk ratio (RR) 0.90; 95% confidence interval (CI) 0.82 to 0.99)<sup>3</sup>.

Many professionals and parents have strong opinions on waterbirth. Some are great advocates, promoting benefits of waterbirth, whilst others remain concerned that women who give birth in water may be exposing themselves or their baby to additional unnecessary risks<sup>4,5,6</sup>.

This study is collecting data on births to all women in 26 UK maternity units from 2015 and is identifying the numbers, proportion and characteristics of women who use water immersion during labour or birth. The study will also establish whether waterbirth is as safe for mothers and their infants as using a pool during labour but getting out prior to birth. Data will be collected on 15,000 waterbirths and 15,000 land births among women with uncomplicated pregnancies from National Health Service (NHS) sites which use Wellbeing Software’s (WS) maternity software system EuroKing®. This study will use data recorded routinely as part of standard maternity care and stored on the respective NHS site’s server. For infants admitted to a neonatal unit (NNU), the study will also use data held by the National Neonatal Research Database (NNRD). Data needed to answer some study questions are already recorded, for example perineal trauma, therefore, data from births from 2015 onwards can be included. Existing, routinely collected data does not capture all information to answer the study questions, data items missing from existing routinely collected data include infants receiving antibiotics without admission to NNU and whether following waterbirth the placenta is delivered in or out of water. Cardiff University (CU) has worked with WS in order to develop study specific data fields which will enable these data to be captured in participating sites from 2019 onwards.

## METHODS AND ANALYSIS

### Primary research objective

To establish whether for low-risk<sup>2</sup> women who use a pool during labour, waterbirth, compared to leaving a pool prior to birth, is as safe for mothers and infants.

### Secondary objectives

To establish:

1. Overall proportion and characteristics of women who use a pool for labour or birth, compared to those who do not use a pool.
2. Characteristics of, and outcomes for, women with risk factors, who use a pool during labour.
3. Characteristics of, and outcomes for, women who develop labour complications who use a pool during labour.
4. Factors associated with rates of pool-use in individual maternity units.

### Primary outcomes

**Maternal primary outcome:** Obstetric Anal Sphincter Injury (OASIS)

**Infant primary outcome:** A composite of 'adverse infant outcomes or treatment' to include:

1. Any NNU admission requiring respiratory support
2. Antibiotic administration within 48 hours of birth (with/without culture proven infection)
3. Intrapartum stillbirth or all deaths prior to NNU/postnatal ward discharge

### Secondary outcomes

**Maternal secondary outcomes:**

Maternal Intrapartum:

- Shoulder dystocia and required management
- Management of the third stage of labour (whether the placenta was intended to be, or delivered in or out of water)
- Obstetric involvement in care
- Incidence and management of perineal trauma
- Maternal position at birth

Maternal Postnatal:

- Duration of postnatal stay
- Breastfeeding
- Need for higher-level care
- Maternal readmission to hospital within seven days of birth.

**Infant secondary outcomes:**

- Timing of cord clamping
- Apgar scores (1, 5 and 10 minutes)
- Cause of intrapartum stillbirth or death prior to NNU/postnatal ward discharge

1  
2  
3 Incidence of:

- 4 • NNU admission requiring respiratory support
- 5 • Antibiotic administration within 48 hours of birth (with/without culture proven infection)
- 6 • Intrapartum stillbirth or neonatal death prior to NNU/postnatal ward discharge occurring within seven
- 7 days of birth
- 8 • Neonatal resuscitation
- 9 • Snapped umbilical cord prior to clamping
- 10 • Skin to skin contact at birth
- 11 • First breastfeed within first hour
- 12 • Culture proven infection
- 13 • Brachial plexus injury
- 14 • Treatment for jaundice
- 15 • Readmission to hospital within seven days of birth
- 16 • Receipt of therapeutic hypothermia
- 17 • NNU admissions
- 18 • Respiratory support

19  
20  
21  
22  
23  
24  
25  
26  
27  
28 A further set of secondary outcomes were piloted at one site including highest C-reactive protein results and  
29 successful/attempted lumbar puncture. Data collection was successful and included in the dataset for all sites.

### 30 31 32 33 **Study Design**

34 A natural experiment using a cohort design with a nested qualitative component will answer study objectives  
35 using a combination of retrospective and prospective data in electronic NHS maternity and neonatal information  
36 systems. The qualitative component will explore factors influencing pool-use and waterbirth. CU has partnered  
37 with WS who supply EuroKing® maternity software system in the UK and the NNRD to link data on infants  
38 transferred to NNU.

39  
40  
41  
42 To answer all objectives approximately 600,000 individual computerised maternity records held on secure NHS  
43 servers in 26 NHS sites from January 2015 will be accessed. To provide necessary denominator data and to be  
44 able to compare characteristics of pool/non-pool users, a dataset will be extracted relating to women who did not  
45 use a pool in labour, a more extensive dataset will be extracted for women who used a pool in labour. An important  
46 clinical question is whether there is a differential effect of waterbirth on severe perineal trauma amongst  
47 nulliparous and parous women. A larger sample size is required for the maternal (30,000) compared to the neonatal  
48 (16,200) primary outcome. To inform the maternal primary outcome, severe perineal trauma, which is already  
49 collected in the maternity information system at study sites, data will be extracted relating to births between  
50 January 1st, 2015 to the end of data collection. The neonatal composite primary outcome includes data items  
51 added at site opening, as essential data are not collected routinely. For this reason, data used to inform the neonatal  
52 primary outcome will only include births occurring between the date of an individual site opening and the end of  
53 data collection.

1  
2  
3 NNRD<sup>7,8</sup> holds individual patient-level data on all infants admitted for NHS neonatal care in England, Wales and  
4 Scotland. To obtain detailed treatment and outcome information on infants admitted to NNU, following their  
5 mothers' pool-use in labour, the identifiers during the period of prospective data collection will be extracted and  
6 matched to any records held by the NNRD.  
7  
8  
9

10 The primary study aim is to compare maternal and infant outcomes for low-risk women who gave birth in water  
11 (Group 1) against low-risk women who left the water prior to birth, with no risk-based or clinical reasons (Group  
12 2) **Error! Reference source not found.** shows and details the study population groups. Women classified as  
13 low-risk for study purposes will be at term (37<sup>+0</sup>-41<sup>+6</sup> weeks gestation), with a singleton fetus in spontaneous  
14 labour with an absence of factors that indicate that obstetric or other medical staff should have involvement in her  
15 care, or birth in an obstetric unit is advised<sup>2</sup>  
16  
17  
18  
19

20 FIGURE ONE  
21  
22

### 23 **Data Providers and Datasets**

24 To answer the research questions, two datasets will be used, data extracted from EuroKing® maternity software  
25 system and data held by the NNRD. EuroKing® forms a comprehensive clinical dataset and is currently used by  
26 26 of the maternity NHS Trusts and Health Boards in the UK. All 200 NNUs in England, Wales and Scotland  
27 form the United Kingdom Neonatal Collaborative (UKNC) and contribute electronic health record data to the  
28 NNRD. The NNRD is a national resource formed of the Neonatal Dataset (an NHS Information Standard),  
29 comprising of 450 clearly defined variables extracted at patient-level from the commercial Electronic Health  
30 Record used by all UK NNUs. For the purpose of the POOL Study NNRD data will only be used from England  
31 and Wales, as no units in Scotland are supported by WS.  
32  
33  
34  
35  
36

37 For the retrospective data collection, the data extract will be created by WS for the period January 2015 until  
38 prospective data collection commences (site opening). This extract will be created remotely via WS accessing  
39 the participating site's server. A unique study number will be generated prior to data leaving the study sites. WS  
40 will transfer a pseudonymised version of this extract to CU and a separate extract of data containing the unique  
41 study number, and identifiers to NNRD (pool-use) using a secure file transfer process. NNRD will proceed to  
42 match the data received from WS to ensure complete records are obtained for infants transferred to NNU and  
43 send the pseudonymised dataset to CU.  
44  
45  
46  
47  
48

49 For prospective data the same format will be followed as for the retrospective data; WS will extract data quarterly  
50 from EuroKing® to CU and NNRD. Prospective data extracts will include the new variables added to EuroKing®  
51 (overview of key data items in Table 1). A separate syntax will direct the NHS number, unique study number  
52 and other identifiers of infants born to all women who used a pool during labour, after site opening, to the NNRD  
53 on a quarterly basis.  
54  
55  
56  
57  
58  
59  
60

1  
2  
3 NNRD will send three matched datasets to CU for analysis (pilot study, once all sites are opened and at the end  
4 of study). Any NNRD data describing infants matched to the study will have NHS numbers removed prior to  
5 data being transferred back to CU with the unique study number.  
6  
7

8 Use of this method of case labelling will enable CU only to hold pseudonymised data, whilst facilitating the  
9 identification of mother/infant dyads and enable the matching of the NNU admission record onto to the mother  
10 and infant record held in EuroKing®, Figure 2 shows Data Flow.  
11  
12  
13  
14  
15  
16  
17  
18  
19  
20  
21  
22  
23  
24  
25  
26  
27  
28  
29  
30  
31  
32  
33  
34  
35  
36  
37  
38  
39  
40  
41  
42  
43  
44  
45  
46  
47  
48  
49  
50  
51  
52  
53  
54  
55  
56  
57  
58  
59  
60

For peer review only

Table 1: Data Sources

| Data Provider      | Data Source               | Data Collection Period | Key Data Items                                                                                                                                                                                                                                                                                                                                                                                                                                                                                                                                                        |
|--------------------|---------------------------|------------------------|-----------------------------------------------------------------------------------------------------------------------------------------------------------------------------------------------------------------------------------------------------------------------------------------------------------------------------------------------------------------------------------------------------------------------------------------------------------------------------------------------------------------------------------------------------------------------|
| Wellbeing Software | NHS Site (Maternity Unit) | From January 2015      | Routinely collected data items: <ul style="list-style-type: none"> <li>• Demographics (including parity, age, ethnicity and deprivation)</li> <li>• Use of pool for labour analgesia/waterbirth</li> <li>• Maternal health</li> <li>• Labour</li> <li>• Birth</li> <li>• Pregnancy history</li> <li>• Maternal medical and obstetric history</li> <li>• Midwifery or obstetric led intrapartum care</li> <li>• Delayed cord clamping (&gt;60 seconds after birth)</li> <li>• Type of intended care throughout labour</li> <li>• Maternal health conditions</li> </ul> |
| Wellbeing Software | NHS Site (Maternity Unit) | From site opening      | <ul style="list-style-type: none"> <li>• Risk status at pool entry</li> <li>• Reasons for pool exit</li> <li>• Obstetric care or input prior to birth</li> <li>• Birthing complications</li> <li>• Cord snapping prior to clamping</li> <li>• Obstetric care in immediate postnatal period.</li> <li>• Syntocinon® administered in water for labour augmentation</li> <li>• Cardiotocography (CTG) used in water</li> <li>• Placenta delivery in or out of water (waterbirths only)</li> <li>• Infant antibiotic administration</li> </ul>                            |

|                                                                                                |                          |                   |                                                                                                                                                                                                                                                                                                                                                          |
|------------------------------------------------------------------------------------------------|--------------------------|-------------------|----------------------------------------------------------------------------------------------------------------------------------------------------------------------------------------------------------------------------------------------------------------------------------------------------------------------------------------------------------|
|                                                                                                |                          |                   | <ul style="list-style-type: none"> <li>• Infant lumbar puncture</li> <li>• Infant blood culture</li> <li>• Highest neonatal CRP result</li> <li>• Treatment for jaundice</li> </ul>                                                                                                                                                                      |
| National Neonatal Research Database<br>(Data relating to neonates admitted to a neonatal unit) | NHS Site (Neonatal Unit) | From January 2015 | <ul style="list-style-type: none"> <li>• Neonatal unit admission and transfer</li> <li>• Level of care and number of days received</li> <li>• Respiratory support</li> <li>• Intravenous antibiotic administration</li> <li>• Intrapartum stillbirth or infant death prior to NNU/postnatal ward discharge</li> <li>• Timing of cord clamping</li> </ul> |
|                                                                                                |                          |                   | <ul style="list-style-type: none"> <li>• Apgar scores</li> <li>• Resuscitation at birth</li> <li>• Culture proven infection</li> <li>• Brachial plexus injury</li> <li>• Treatment for jaundice</li> <li>• Readmission to neonatal unit within seven days of birth</li> <li>• Therapeutic hypothermia</li> </ul>                                         |



## FIGURE TWO

### Opportunity to Opt-Out

This study will use data collected in NHS electronic systems that will be pseudonymised prior to transfer to the CU study team (Table 1). Approval for the transfer of identifiable patient data from WS to NNRD in order to match the infants transferred to NNU has been obtained under Section 251 (s251) of the NHS Act 2006.

Participants will have the option to opt-out by informing the maternity unit that they do not wish to participate. CU will provide individual sites with patient information leaflets, posters and take-home cards. Individual sites are responsible for ensuring all women are provided with relevant information to ensure they are aware of the option to opt-out.

### Qualitative Component

The aim of the qualitative component of the study is to identify and explore factors which influence the use of birth pools and giving birth in water.

#### Phase 1:

Six closed online discussion groups hosted on the CU website and telephone interviews:

1. Women with recent experience of maternity services
2. Heads of Midwifery and Midwifery Managers
3. Consultant Midwives
4. Band 5/6 clinically focused Midwives
5. Obstetricians
6. Neonatologists and Paediatricians

#### Phase 2:

In-depth organisational case studies across three study sites, comprising midwifery-led and obstetric units with a range of waterbirth rates. Data points:

- Key documents, online information and existing data relating to pool-use and waterbirth
- Information relating to unit equipment and facilities
- Group or individual discussions with staff and lay representatives

### Study Participants Inclusion and Exclusion Criteria

Cohort study:

Main Analysis: All women at low-risk of complications who use a birth-pool or bath for water immersion during established labour between 1<sup>st</sup> January 2015 and the end of data collection. Women will be classified as 'low risk' if they are at term (37<sup>+0</sup> – 41<sup>+6</sup> weeks gestation), with a singleton assumed cephalic fetus, in spontaneous labour, and without pregnancy or intrapartum factors identified by NICE that indicate a need for obstetric or other medical care in labour.

1  
2  
3 Women who freebirth or give birth prior to arrival at their chosen place of birth or prior to the arrival of a midwife  
4 will be excluded.

5  
6 Descriptive analysis: All women giving birth at a participating NHS site between 2015 and 2020.

7 Eligible sites: NHS maternity services using EuroKing® with waterbirth facilities.  
8  
9

10 Qualitative component Phase 1:

11 (Participants must be from the UK, either within or outside study sites)  
12  
13

14 Online discussion group participants:

- 15 • Pregnant women or who have given birth within the last 12 months.
- 16 • Midwives (all grades/positions)
- 17 • Neonatologists, Obstetricians and Paediatricians (including trainees)

18  
19  
20  
21  
22 Telephone interview participants:

- 23 • UK Neonatologists\*
  - 24 • Obstetricians\*
  - 25 • Paediatricians\*
- 26  
27  
28 \*(including trainees)  
29  
30

31 Qualitative component Phase 2:

32 Purposively selected case study sites to include midwifery and obstetric units with a range of waterbirth rates  
33 (excluding units without a waterbirth facilities).  
34  
35

36 In each case study site, participants are purposively sampled for discussions, to include the following:

- 37 • Midwives representing a range of grades and positions
- 38 • Obstetricians, Neonatologists and Paediatricians (including trainees)
- 39 • Other unit staff as identified
- 40 • Women who have given birth in the unit recently
- 41 • Lay representatives who have experience of supporting local women who have given birth recently – e.g.  
42 doulas  
43  
44  
45  
46  
47

#### 48 **Recruitment/Opt-out**

49 For the cohort study data will be collected on all women and babies born at participating sites from January 2015  
50 until study end date unless they choose to opt-out of the study.  
51  
52  
53

54 The online discussion groups will be advertised via social media, magazine articles, e-mail circulation and  
55 leaflets/flyers handed out at conferences. Adverts will provide a brief overview of the discussion groups and a  
56 website link which will contain study overview, a Participant Information Sheet (PIS) and discussion group  
57 ground rules. If keen to participate, individuals will submit their email address via the website, which will  
58 generate an automated email invitation with a link to the discussion group registration page. Participants will be  
59  
60

1  
2  
3 asked to complete an online consent form, create an anonymous public forum name and password to log in to  
4 the discussion, and click to confirm that they agree to comply with the discussion group ground rules.  
5  
6

7 The telephone interviews will be advertised via professional and lay networks, including social media and email  
8 circulation. Adverts will provide a brief overview of the study and the purpose of the interviews, together with a  
9 contact email address for those interested in taking part. Potential participants will be emailed a copy of the PIS  
10 and given the opportunity to ask questions. Those who would like to take part will be asked via email to agree a  
11 date for the interview.  
12  
13  
14  
15

16 For Phase 2 of the qualitative work, data provided by sites will be used to identify midwifery-led and obstetric  
17 units, enabling the team to work with sites with both low and high waterbirth rates. Once potential sites are  
18 identified, the site PI will be contacted by a member of the study team, provided with information about the case  
19 studies and invited to take part. For the discussions within the case study sites, the study will be publicised at unit  
20 meetings and via local networks, and potential participants requested to contact the research team to receive  
21 information. Researchers will also approach staff members and lay representatives directly to encourage voluntary  
22 participation. A PIS and opportunity to ask questions will be provided. Those who would like to take part will be  
23 asked to contact the researchers to arrange to participate in a discussion.  
24  
25  
26  
27  
28

### 29 *Justification of approach*

30 The POOL Study will collect data on 600,000 mother/infant dyads with three years of these data having been  
31 collected in electronic systems prior to site opening. It is not practical to ask for consent from every woman and  
32 doing so would inevitably lead to an incomplete cohort and potentially a biased sample. The study will involve  
33 the transfer of personal data to NNRD and for this we are using an opt-out model under s251, as approved by the  
34 Confidentiality Advisory Group (CAG).  
35  
36  
37  
38

### 39 *Development of the opt-out leaflet/cards*

40 We worked closely with the study PPI representatives on the wording of these documents. A key consideration  
41 was to ensure that there were multiple timepoints for the mother to opt-out of the study throughout her episode  
42 of maternity care, by informing a midwife or making contact with the maternity unit. In addition to informing  
43 all women during pregnancy that the study is running in their maternity unit, any woman who uses a pool during  
44 labour or birth will be provided with a study card. This will reinforce the option to opt-out of the study with  
45 relevant contact details. The final text was approved by both an NHS Research Ethics Committee (REC) and  
46 CAG committee as part of the overall governance approval for the study.  
47  
48  
49  
50  
51

### 52 *Process to manage opt-out*

53 If opt-out is selected, a healthcare worker will select the opt-out option on EuroKing®, automatically generating  
54 a filter so that WS will not extract the mother's/infant's data, nor will data be sent to the NNRD. It was not  
55 practical to offer the chance to opt-out to women who gave birth at participating units in the period between  
56 January 2015 to date of site opening.  
57  
58  
59  
60

1  
2  
3 For the online discussion groups, participants may contribute as much or as little as they wish. For face-to-face  
4 and telephone discussions, participants have the right to decline or withdraw consent at any time, without any  
5 effect on their care or employment.  
6

### 7 **Patient and Public Involvement (PPI)**

8  
9 Lay persons were involved in the original grant proposal, development of research questions, study design and  
10 outcomes. The study management group and the study steering committee have PPI representatives who were  
11 actively engaged in study design and study conduct.  
12  
13

### 14 **Governance and Compliance**

15  
16 Following REC approval (18/WA/0291) and s251 support (18CAG0153) retrospective data extracts were made  
17 from the pilot site. New variables were added to EuroKing® for the commencement of prospective data  
18 collection.  
19  
20

21  
22 In order to satisfy the requirements of the s251 support the Data Security and Protection Toolkit (DSPT)<sup>9</sup>  
23 commissioned by the Department of Health for NHS Digital to develop and maintain) was required for both WS  
24 (registered as Healthcare Software Solutions) and NNRD (registered as Chelsea and Westminster Hospital NHS  
25 Foundation Trust). This organisation-level assessment provides reassurance of satisfactory information  
26 governance within the two organisations. Both the s251 support and DSPT are assessed and renewed on an  
27 annual basis.  
28  
29  
30

### 31 **Analysis**

#### 32 *Sample size*

33  
34 The non-inferiority of birth in water compared to birth on land on rates of OASIS will be examined by parity. The  
35 Birthplace in England study found that overall 4.6% and 1.6% of nulliparous and parous women respectively,  
36 sustained OASIS<sup>10</sup>. A sample size of 15,000 nulliparous and 15,000 parous low-risk women (7,500 each water  
37 and land) is required to obtain 90% power, and a 95% one-sided confidence interval around a treatment difference  
38 of zero. A non-inferiority margin of 1% or less, and 0.6% or less will be taken as clinically non-significant  
39 amongst nulliparous and parous low-risk women respectively. Since nulliparous women birthing in water are  
40 regarded as the least prevalent of the four groups, the data collected would provide data on 7,500 would ensure  
41 adequate numbers in the other three, more prevalent groups. These data will be combined to assess the effects  
42 averaged across both strata at an increased power, with a sample size of 30,000 low-risk women. We have  
43 assumed that 25% of the 6,600 waterbirths recorded in EuroKing® in 2015 were nulliparous women  
44 (1650/annum). For the infant primary outcome, an estimate of 5% is used for the proportion of infants born to  
45 low-risk mothers experiencing 'adverse infant outcome or treatment'<sup>11</sup>. A non-inferiority margin of 1.0% or less  
46 will be taken as clinically non-significant. A sample size of 16,200 infants (8,100 per group water/land) are  
47 required to have 90% power, and a 95% one sided confidence interval around a treatment difference of zero.  
48  
49  
50  
51  
52  
53  
54  
55

#### 56 **Main analysis**

57  
58 Primary analysis will compare maternal and infant outcomes only between women without identified pregnancy  
59 or intrapartum complications 'low-risk' who stay and give birth in the pool (waterbirth, Group 1) compared with  
60

women without identified pregnancy or intrapartum complications ‘low-risk’ who use water immersion during their labour but decide to leave the water for birth (out of water, Group 2).

The primary analyses are based on a non-inferiority test of birth in water versus on land, comparing 1) the proportion of mothers that have OASIS (based on retrospective and prospective EuroKing® data), and 2) the proportion of infants with a composite outcome of ‘adverse infant outcome or treatment’ (based on prospective EuroKing® and NNRD data).

To test the primary hypothesis of non-inferiority between birth in water and on land, the maternal and infant primary outcomes will be evaluated for non-inferiority using logistic regression models, in the first instance with no adjustment for covariates. Adjusting for potential confounders may result in a more precise treatment effect estimate. The potential confounders of both primary outcomes (listed in Table 2) will be considered. Directed acyclic graphs; visual representations of causal assumptions will be used to identify the presence of confounders.

The main logistic model will incorporate these selected covariates through regression adjustment. Results will be reported as an unadjusted and adjusted odds ratio (OR) (comparing birth in water to on land), and a two-sided 90% confidence interval (CI) for the unadjusted and adjusted OR will be calculated. Non-inferiority will be concluded if the upper limit of the 90% CI for the difference in infant outcome between the groups is less than 1.0% (OR<1.21). Similarly, for the mother’s outcome, non-inferiority will be concluded if the upper limit of the 90% CI for the difference in the proportion of OASIS between the groups is less than 1.0% (OR<1.23) in nulliparous low-risk women and less than 0.6% (OR<1.38) in parous low-risk women. The data will then be combined to assess the effects averaged across both strata.

Table 2: Potential confounders for both maternal and infant primary outcomes

|                                                                                  | <b>Maternal outcome: OASIS</b> | <b>Adverse infant composite outcome</b> |
|----------------------------------------------------------------------------------|--------------------------------|-----------------------------------------|
| Maternal age (years)                                                             | X                              | X                                       |
| Maternal BMI                                                                     | X                              | X                                       |
| Parity                                                                           | X                              |                                         |
| Duration of labour                                                               | X                              | X                                       |
| Gestational age at delivery (weeks)                                              | X                              | X                                       |
| Birth weight (g)                                                                 | X                              | X                                       |
| Infant head circumference (cms)                                                  | X                              |                                         |
| Maternal thyroid disease (including hypothyroidism)                              |                                | X                                       |
| Pre-labour ruptured membranes                                                    |                                | X                                       |
| Intrapartum fever                                                                |                                | X                                       |
| Small for gestational age (weight <10 <sup>th</sup> centile for gestational age) |                                | X                                       |
| Infant gender                                                                    |                                | X                                       |
| Meconium-stained liquor                                                          |                                | X                                       |

If non-inferiority is shown, then superiority analysis will be conducted as secondary analysis of the primary outcomes using logistic regression and will be presented as (unadjusted and adjusted) OR of outcomes in the

1  
2  
3 waterbirth group compared with the birth on land group. Parameter estimates will be provided alongside 95% CI  
4 and p-value. Secondary outcomes will have non-inferiority testing as detailed above.  
5  
6

7  
8 Secondary analysis will describe the type and rates of complications in Group 3 along with the associated maternal  
9 and infant outcomes. Secondary analysis for Group 4 will describe the type and rates of known risk factors among  
10 women using a pool, along with associated care (for example use of waterproof CTG) maternal and infant  
11 outcomes.  
12  
13

14  
15 Maternal characteristics such as age, parity and ethnicity of all women giving birth in the study sites during data  
16 collection will be obtained and the characteristics of women who do and who not use a pool during labour, will  
17 be compared and described.  
18  
19

20  
21 All telephone and face-to-face discussions in Phase 1 and Phase 2 will be audio-recorded and transcribed verbatim  
22 For Phase 1 of the qualitative component, framework analysis will be undertaken to generate key hypotheses for  
23 further exploration in Phase 2. In Phase 2, data will be thematically analysed initially, supported by NVivo, in  
24 order to develop an analytic framework, which will then be used to code all data.  
25  
26  
27  
28

## 29 **ETHICS AND DISSEMINATION**

### 30 **Legal and Ethical Considerations**

31  
32 The cohort component uses routinely collected data without obtaining informed consent from participants; this  
33 required additional approval, s251, from a CAG. The level of national and international recognition of the  
34 importance of the smarter use of routine data, and its value to research, has never been greater. There are,  
35 however, challenges associated with using routinely collected data.<sup>12</sup>  
36  
37  
38

39 One primary consideration is of unintentional identification of individuals. This risk is managed through  
40 pseudonymising identifiable data prior to matching and before being transferred to CU for analysis and data  
41 scrutiny and cleaning on arrival.  
42  
43  
44

45 Participation in the online discussion groups and face-to-face or telephone discussions may bring back memories  
46 of difficult or distressing experiences. It is made clear in the PIS that participants can opt-out of discussions at  
47 any time, without giving a reason, and do not have to answer any questions they do not want to. There is a risk  
48 that online discussion group participants may encounter communication from other group members which causes  
49 distress. To mitigate this, participants will be asked to agree to a set of ground rules, including a section  
50 requesting they act in a respectful way to members. The discussion will be moderated by researchers during  
51 office hours (Monday to Friday, 9am to 5pm) and any unsuitable content will be removed. Repeated posting of  
52 unsuitable content by a group member will result in their being blocked. At any time, any participant who regards  
53 posted material as offensive will have the option of having the post removed from view.  
54  
55  
56  
57  
58  
59  
60

There is a risk of loss of privacy for participants in the qualitative study if data which identifies them is disclosed outside the study. Any information which could identify individuals or individual workplaces will be removed following data collection and will not be used in the reporting of findings. Quotes from discussion groups or interviews may be used in reports of the research, but no individuals or individual workplaces will be identified.

### Data Processors and Data Controllers

#### *Relationship between CU and NHS Sites*

For the purposes of the research activities involved in POOL, CU is the Data Controller and the NHS Site is the Data Processor. For the avoidance of doubt, this is not in relation to the activities carried out as part of usual clinical practice but relates to the specific use of the data made for the research and also includes the new variables added to the EuroKing® system.

#### *Relationship between Wellbeing Software, NNRD and NHS Sites*

WS and NNRD are Data Processors in respect of all NHS Data collected by them from NHS sites in the course of their normal activities and in that they are processing NHS Data on behalf of NHS Sites who are Data Controllers.

#### *Dissemination of findings*

Dissemination of the study results will include publication in high calibre journals through an open access agreement, a full report, a lay infographic summary aimed at pregnant women and available for use by NHS providers, and distribution through social media including podcasts or similar.

In addition to dissemination of results through publication, the results will be reported to the funder, WS, NNRD and all participating sites as well as all stakeholder groups associated with the POOL Study. On completion there will be a stakeholder event for results dissemination.

Table 3 provides a list of abbreviations used throughout the paper.

Table 3: List of abbreviations

| Abbreviation | Full details                                      |
|--------------|---------------------------------------------------|
| CAG          | Confidentiality Advisory Group                    |
| CRP          | C-reactive protein                                |
| CU           | Cardiff University                                |
| HTA          | Health Technology Assessment                      |
| IG           | Information Governance                            |
| NHS          | National Health Service                           |
| NICE         | National Institute for Health and Care Excellence |
| NIHR         | National Institute for Health Research            |
| NNRD         | National Neonatal Research Database               |
| OASIS        | Obstetrical Anal Sphincter Injuries               |
| REC          | Research Ethics Committee                         |
| s251         | Section 251 NHS Act 2006                          |
| WS           | Wellbeing Software                                |

### AUTHORS CONTRIBUTIONS

RM has written the majority of the manuscript.

SM has provided content for the qualitative aspect of the manuscript.

RCJ has provided content for the statistical aspect of the manuscript.

JS, RC-J and FLW co-wrote the protocol.

CG has provided NNRD elements for the manuscript

MR, SP, CB, PB, SC, AH, BH, LM, RP and MN have all read and approved the final manuscript.

### FUNDING STATEMENT

This work was supported by the National Institute for Health Research Health Technology Assessment (project number 16/149/01). The views and opinions expressed therein are those of the authors and do not necessarily reflect those of the NIHR HTA.

### COMPETING INTERESTS STATEMENT

None to declare.

### ACKNOWLEDGEMENTS

The Centre for Trials Research is funded by Health and Care Research Wales and Cancer Research UK.

### REFERENCES

1. House of Commons. *House of Commons Health Select Committee. Maternity Services. Second Report.*; 1992
2. NICE. Intrapartum care for healthy women and babies. December 2014.
3. Er C, Burns E, Cuthbert A. Immersion in water during labour and birth (Review). 2018. doi:10.1002/14651858.CD000111.pub4.www.cochranelibrary.com
4. Franzin L, Cabodi D, Scolfaro C, Gioannini P. Microbiological investigation of a nosocomial case of *Legionella pneumophila* in acqua e revisione dei casi neonatali. 2004:69-75.
5. *Pseudomonas Otitis Media and Bacteremia Following a Water Birth* \_ American Academy of Pediatrics.
6. Mammas IN, Thiagarajan P. Water aspiration syndrome at birth – report of two cases. 2009;7058. doi:10.1080/14767050802556067
7. Gale C, Santhakumaran S, Nagarajan S, Statnikov Y, Modi N. Impact of managed clinical networks on NHS specialist neonatal services in England: Population based study. *BMJ*. 2012;344(7853):1-15. doi:10.1136/bmj.e2105
8. Battersby C, Statnikov Y, Santhakumaran S, Gray D, Modi N, Costeloe K. The United Kingdom national neonatal research database: A validation study. *PLoS One*. 2018;13(8):1-19. doi:10.1371/journal.pone.0201815
9. Data Security and Protection Toolkit. <https://www.dsptoolkit.nhs.uk> Accessed 18th May 2020.



1  
2  
3 10. Birthplace in England Collaborative G, Brocklehurst P, Hardy P, et al. Perinatal and maternal outcomes by  
4 planned place of birth for healthy women with low-risk pregnancies: The Birthplace in England national  
5 prospective cohort study. *BMJ* 2011;343:d7400.

6  
7 11. Hollowell J PD, Rowe R, Linsell L, Hardy P, Stewart, M, et al. The Birthplace national prospective cohort  
8 study: perinatal and maternal outcomes by planned place of birth. Birthplace in England research programme.  
9 Final report part 4. NIHR Service Delivery and Organisation programme. 2011.

10  
11 12. *Maximising the Use of Routine Data for Research in Wales*.; 2013.  
12 [https://www.healthandcareresearch.gov.wales/uploads/Policy %26 Strategy/Use of routine data/Maximising the](https://www.healthandcareresearch.gov.wales/uploads/Policy%26Strategy/Use%20of%20routine%20data/Maximising%20the%20Use%20of%20Routine%20Data%20for%20Research%20in%20Wales.pdf)  
13 [Use of Routine Data for Research in Wales.pdf](https://www.healthandcareresearch.gov.wales/uploads/Policy %26 Strategy/Use of routine data/Maximising the). Accessed November 13, 2018.  
14  
15  
16  
17  
18

### 19 **FIGURE LEGEND**

20 *Figure 1: Study Population Groups:* Overview of the four groups of women within the POOL Study population  
21 and how these groups will be compared and their data reported.  
22  
23

24 *Figure 2: Data Flow:* A description of how the data flows from new variables being input into the E3 maternity  
25 system to analysis.  
26  
27  
28  
29  
30  
31  
32  
33  
34  
35  
36  
37  
38  
39  
40  
41  
42  
43  
44  
45  
46  
47  
48  
49  
50  
51  
52  
53  
54  
55  
56  
57  
58  
59  
60

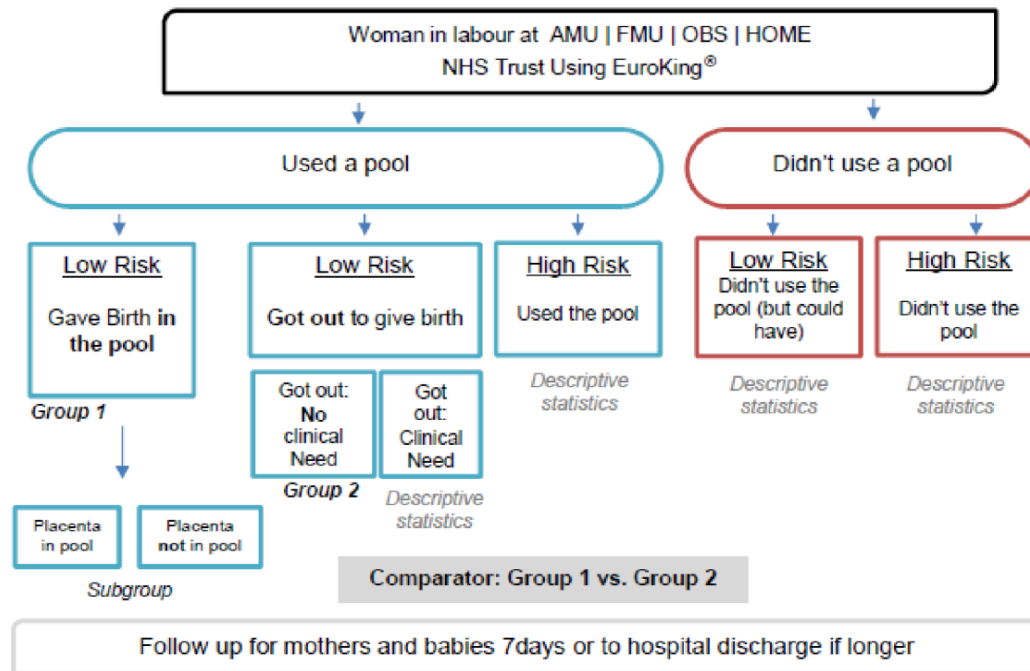

Figure 1 Study population groups

**Group 1:** women without identified pregnancy or intrapartum complications; 'low-risk' who stay and give birth in the pool. Women who were considered to be without complications and remained in the pool intending to give birth in water, but who at birth experienced a shoulder dystocia or previously unrecognised breech presentation, with the baby then partially being born into water, (including for example only head, legs or buttocks) will continue to be included in Group 1. **Group 2:** women without identified pregnancy or intrapartum complications 'low-risk' who use water immersion during their labour but decide to leave the water for birth. Similarly, women in Group 2 will include women who were regarded as 'low-risk' but who subsequently experienced shoulder dystocia or breech presentation identified at birth. **Group 3:** women who were identified by their midwife as not having any risk factors when they first got in the pool but later developed, or had a complication in labour identified, and left the water prior to birth. **Group 4:** women who were known to have risk factors when they first got in the pool.

**Figure Legend:** Overview of the four groups of women within the POOL Study population and how these groups will be compared and their data reported.

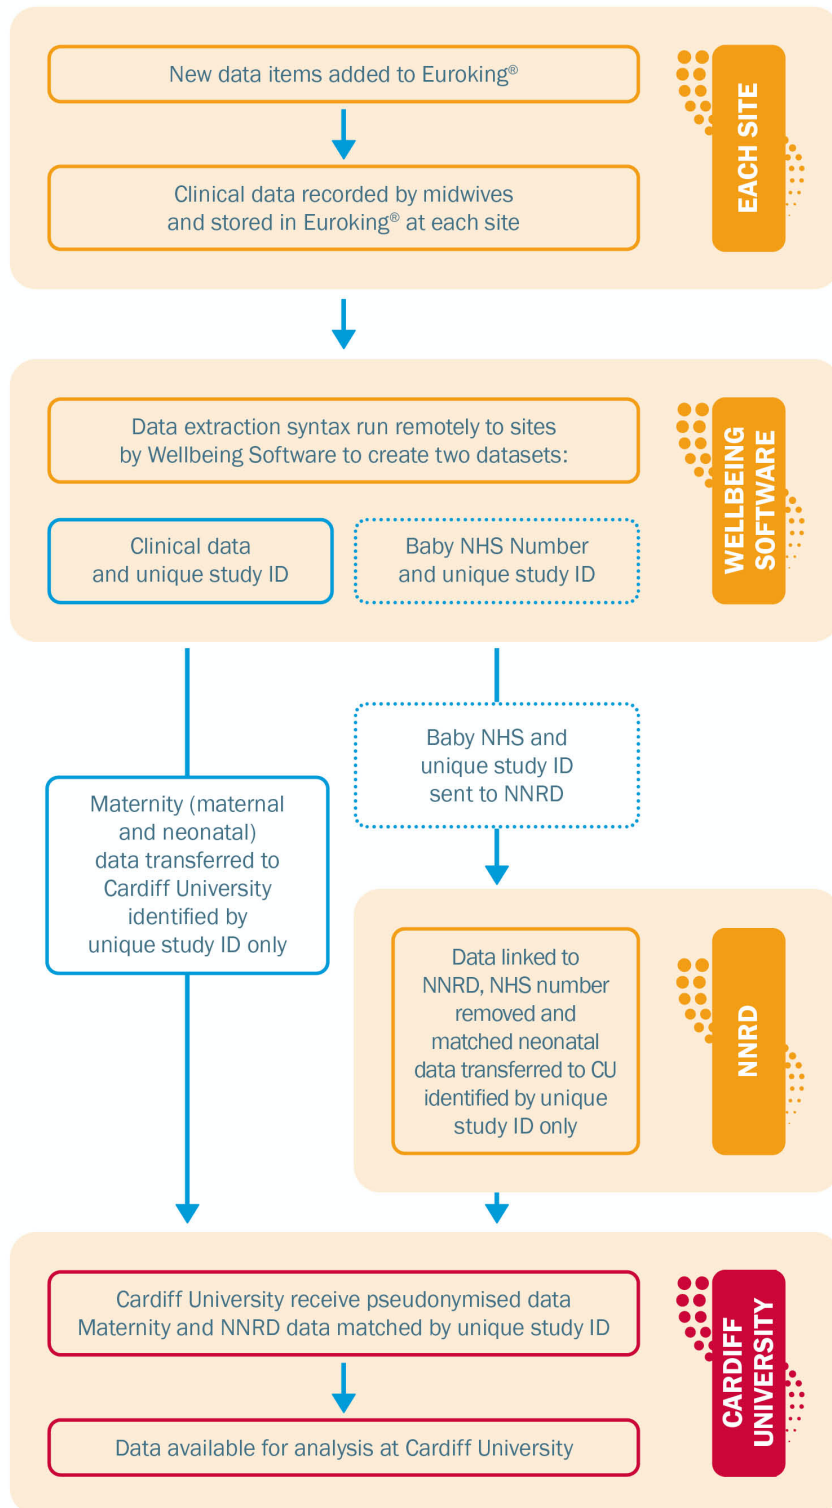

Figure 2 Data flow

**Figure Legend:** A description of how the data flows from new variables being input into the E3 maternity system to analysis.
